# Supplementary material for: The farther, the better? The effect of attentional focus distance on motor performance: a systematic review and meta-analysis
Source: PeerJ. 2025 Sep 8;13:e20012. doi: 10.7717/peerj.20012 (PMC12424610; doi:10.7717/peerj.20012)
Supplement: Supplemental Information 1 [file peerj-13-20012-s001.xlsx]

## Sheet: Sheet1
	Distal focus				Proximal focus				Internal focus
Author + Year	Mean	Sd	N		Mean	Sd	N		Mean	Sd	N
Banks 2020	30.63	3.21	27		32.07	3.21	27		-	-	-
Bell 2009	1.5	0.44	11		2.1	0.18	11		2.98	0.14	11
Bull 2022	3.85	2.19	13		4.46	1.81	13		6.69	1.84	13
Chen 2022	5.18	4.69	15		9.96	5.4	15		7.23	5.37	15
Kupper 2020a	4.93	1.33	18		4.49	1.3	18		-	-	-
Kupper 2020b	17.86	4.2	18		17.81	4.25	18		-	-	-
Marchant 2018	116.3	20.71	54		114.19	20.19	54		113.91	19.32	54
McKay 2012	6.84	1.25	36		6.26	1.5	36		-	-	-
Nagano 2020	101	3.5	10		106.5	7.7	10		-	-	-
Niźnikowsk 2022	84.46	19.2	17		76.99	13.13	17		75.19	10.28	17
Pelleck 2017a	1.961	36.85	11		8.363	37.127	11		2.672	37.543	11
Pelleck 2017b	1.73	30.178	13		6.22	34.367	13		5.361	28.084	13
Peng 2024a	185239	31350	10		179807	31406	10		170531	34636	10
Peng 2024b	220274	28558	11		218591	24256	11		216094	24045	11
PORTER 2012	212.74	28.89	35		207	30.46	35		-	-	-
PORTER 2013	224.2	22.5	38		216.2	24.8	38		204.4	26	38
Roberts 2019	4.49	0.61	15		3.56	0.52	15		4.35	0.7	15
Singh 2020a	95.7	67	17		104.8	72.3	17		-	-	-
Singh 2020b	194.4	47.1	12		168.6	53.8	12		-	-	-
Singh 2022	1.82	0.32	20		1.42	0.39	20		1.27	0.37	20
